# Supplementary material for: Single-step pyrolysis of biomass waste-derived activated carbon encapsulated zero-valent nickel NPs for the purification of antibiotic-contaminated water
Source: Royal Society of Chemistry journal article supplement (doi:10.1039/d4nj01386g), 2024-01-01
Supplement: d4nj01386g1.pdf [file d4nj01386g1.pdf]

**Single-step pyrolysis of biomass waste-derived activated carbon encapsulated zero-valent  
nickel NPs for purification of antibiotic-contaminated water**

Badr M. Thamer<sup>1\*</sup>, Faiz A. Al-aizari<sup>1</sup>, Hany S. Abdo<sup>2</sup> Mohamed M. El-Newehy<sup>1</sup> and Abdullah M.  
Al-Enizi<sup>1</sup>

<sup>1</sup> Chemistry Department, Science College, King Saud University, P.O. Box 2455, Riyadh 11451,  
Saudi Arabia

<sup>2</sup>Mechanical Engineering Department, Engineering College, King Saud University, Riyadh, 11421,  
Saudi Arabia

\*Corresponding author; bthamer@ksu.edu.sa

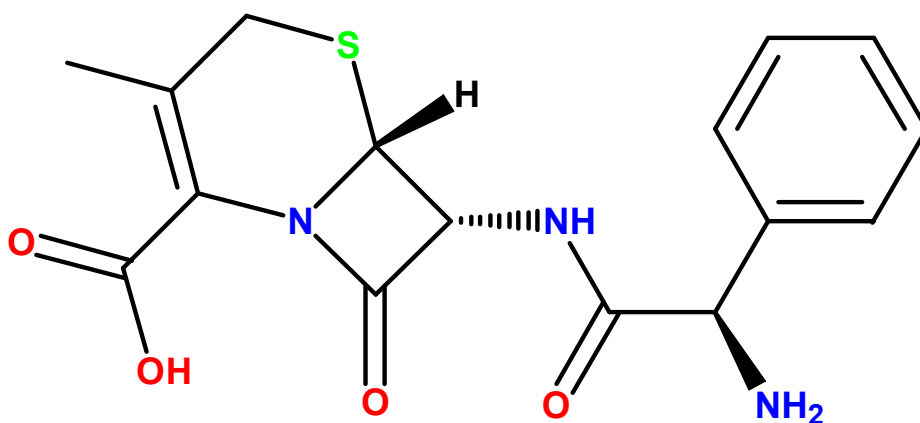

Fig. S1. The chemical structure of CPX.

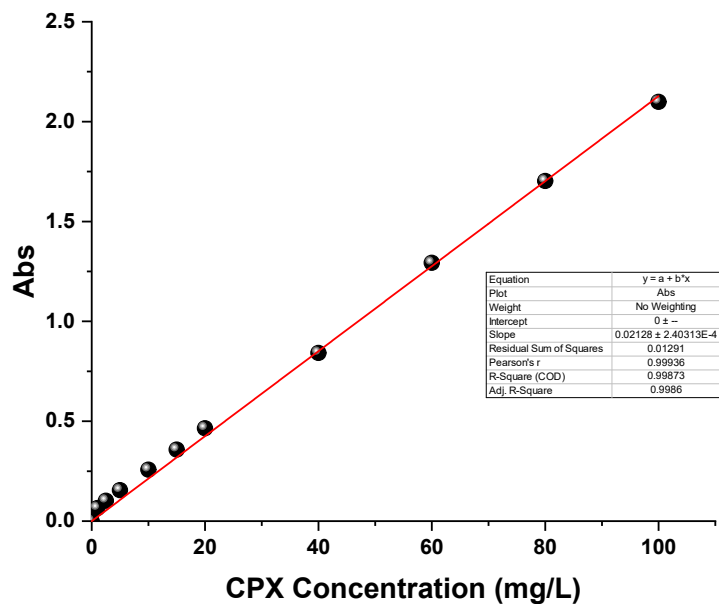

Fig. S2. Standard calibration curve for CPX.

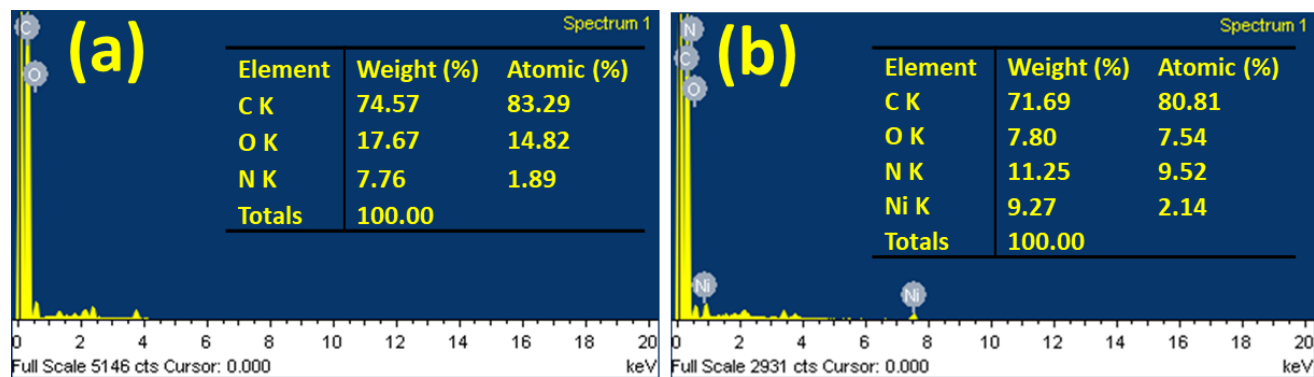

Fig. S3. EDX analysis of (a) AC, (b) ZVNi@AC.

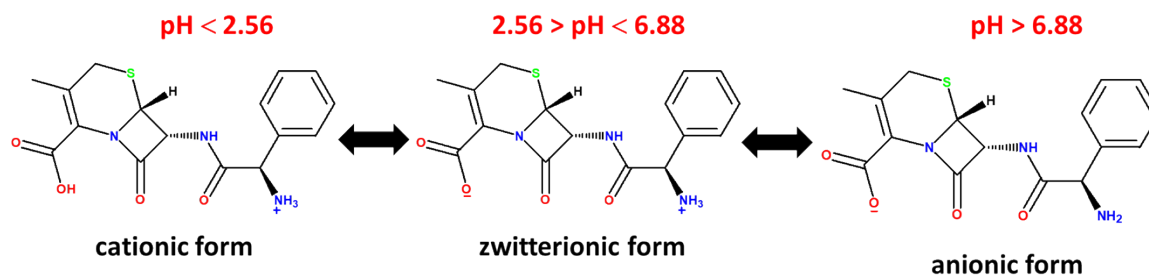

Fig. S4. Ionic forms of CPX as a function of pH.

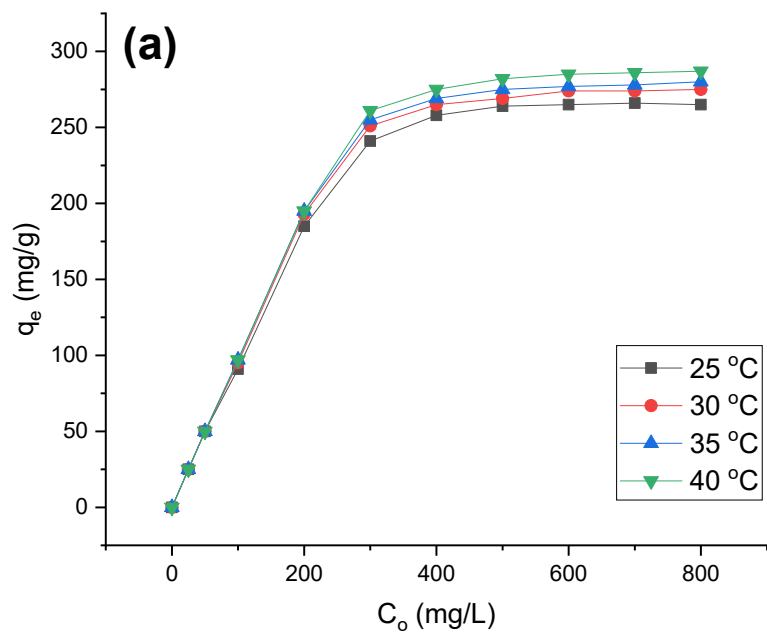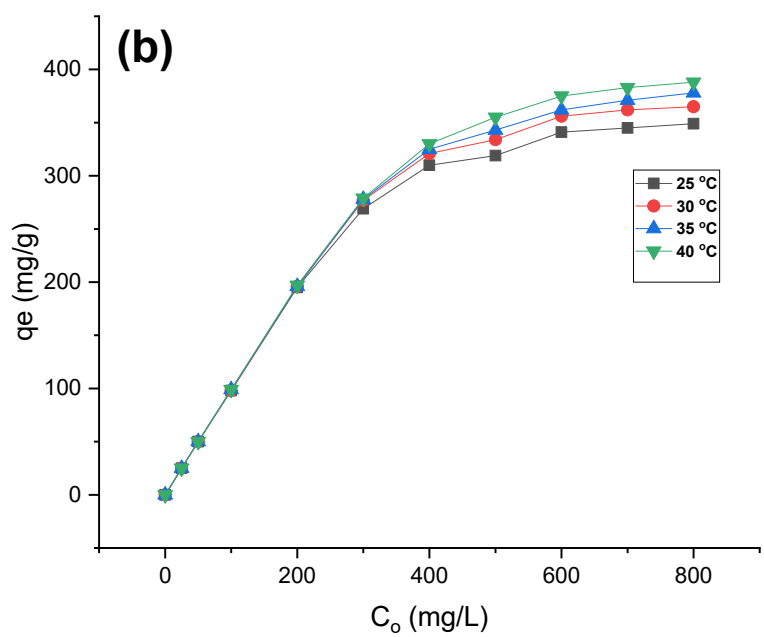

Fig. S5. effect of CPX concentration at various temperatures.

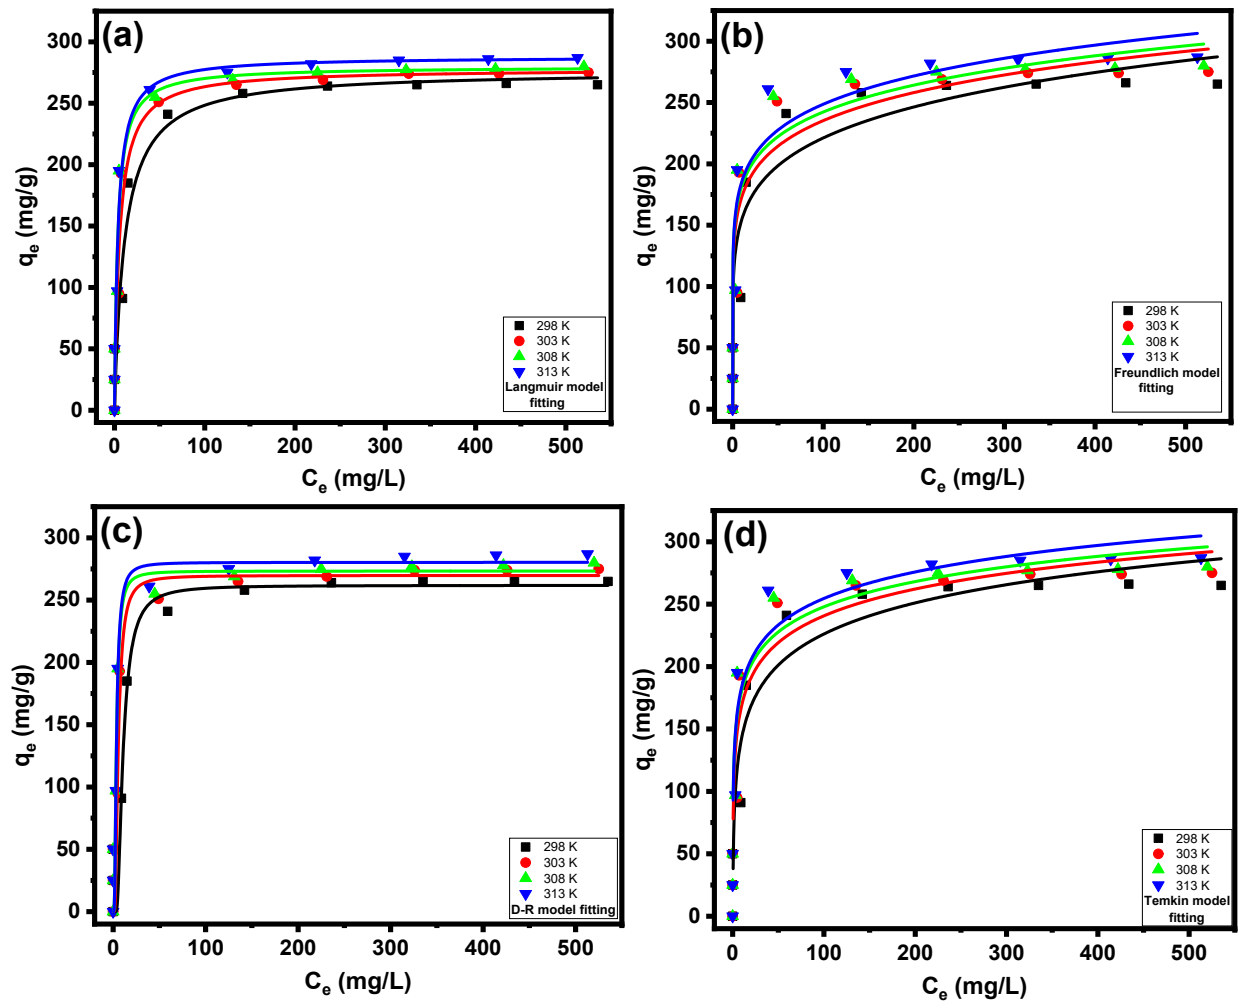

Fig. S6. Fitting of experimental adsorption data of AC at different temperatures by (a) Langmuir model, (b) Freundlich model, (c) D-R model and (d) Temkin model.

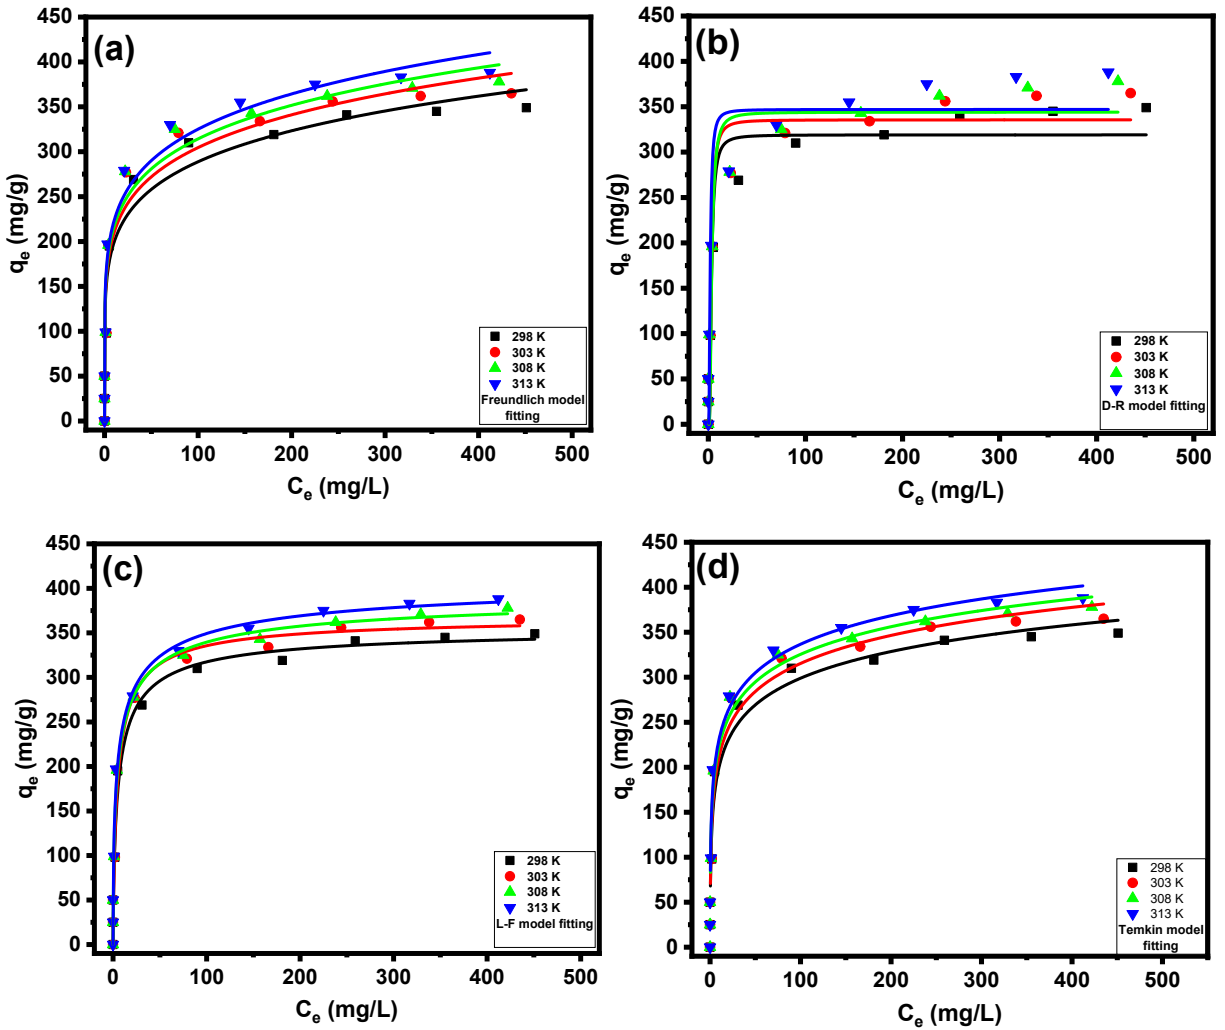

Fig. S7. Fitting of experimental adsorption data of ZVNi@AC at different temperatures by (a) Freundlich model, (b) D-R model, (c) L-F model and (d) Temkin model.

**Table S1.** Comparison of adsorption capacity and reusability of various reported adsorbent with ZVNi@AC.

| Adsorbent                                        | $q_{\max}$<br>(mg/g) | No. of reuse<br>cycles | % Removal<br>after reuse | Ref.       |
|--------------------------------------------------|----------------------|------------------------|--------------------------|------------|
| Chitin-activated carbon                          | 245.19               |                        |                          | [1]        |
| A.L. seed pods-carbon                            | 137                  |                        |                          | [2]        |
| Walnut shell- activated carbon                   | 233.1                | -                      | -                        | [3]        |
| Aloe vera leaf waste- activated carbon           | 26.34                | 5                      | 82.05                    | [4]        |
| Fiber Palm                                       | 57.4                 | -                      | -                        | [5]        |
| Alligator activated carbon                       | 45                   | -                      | -                        | [6]        |
| boron nitride nanosheets                         | 225                  |                        |                          | [7]        |
| Fe <sub>3</sub> O <sub>4</sub> coated zeolite    | 24.9                 | -                      | -                        | [8]        |
| MnO <sub>2</sub> coated zeolite                  | 24.5                 |                        |                          | [9]        |
| Cu <sup>2+</sup> @activated carbon               | 78.13                |                        |                          | [10]       |
| Acidic pretreated jackfruit                      | 384.62               | -                      | -                        | [11]       |
| zirconium-based metal–organic framework          | 442.5                | 4                      | 90                       | [12]       |
| $\alpha$ -Fe <sub>2</sub> O <sub>3</sub>         | 70                   | 5                      | 89                       | [13]       |
| Fe <sub>3</sub> O <sub>4</sub> -activated carbon | 38.61                | 4                      | 47.6                     | [14]       |
| ZVI@activated carbon                             | 87.18                | 4                      | 49.72                    | [15]       |
| ZVNi@activated carbon                            | 367.59               | 5                      | 92                       | This study |

#### References:

- [1] W.A. Khanday, M.J. Ahmed, P.U. Okoye, E.H. Hummadi, B.H. Hameed, Single-step pyrolysis of phosphoric acid-activated chitin for efficient adsorption of cephalexin antibiotic, *Bioresour. Technol.* 280 (2019) 255–259. <https://doi.org/10.1016/J.BIORTECH.2019.02.003>.
- [2] M.J. Ahmed, S.K. Theydan, Adsorption of cephalexin onto activated carbons from Albizia lebbeck seed pods by microwave-induced KOH and K<sub>2</sub>CO<sub>3</sub> activations, *Chem. Eng. J.* 211–212 (2012) 200–207. <https://doi.org/10.1016/J.CEJ.2012.09.089>.
- [3] G. Nazari, H. Abolghasemi, M. Esmaili, Batch adsorption of cephalexin antibiotic from

- aqueous solution by walnut shell-based activated carbon, *J. Taiwan Inst. Chem. Eng.* 58 (2016) 357–365. <https://doi.org/10.1016/J.JTICE.2015.06.006>.
- [4] F. Hashemzadeh, M. Ariannezhad, S.H. Derakhshandeh, Evaluation of Cephalexin and Amoxicillin removal from aqueous media using activated carbon produced from Aloe vera leaf waste, *Chem. Phys. Lett.* 800 (2022) 139656. <https://doi.org/10.1016/J.CPLETT.2022.139656>.
- [5] N. Acelas, S.M. Lopera, J. Porras, R.A. Torres-Palma, Evaluating the Removal of the Antibiotic Cephalexin from Aqueous Solutions Using an Adsorbent Obtained from Palm Oil Fiber, *Mol.* 2021, Vol. 26, Page 3340. 26 (2021) 3340. <https://doi.org/10.3390/MOLECULES26113340>.
- [6] M.S. Miao, Q. Liu, L. Shu, Z. Wang, Y.Z. Liu, Q. Kong, Removal of cephalexin from effluent by activated carbon prepared from alligator weed: Kinetics, isotherms, and thermodynamic analyses, *Process Saf. Environ. Prot.* 104 (2016) 481–489. <https://doi.org/10.1016/J.PSEP.2016.03.017>.
- [7] R.S. Bangari, N. Sinha, Adsorption of tetracycline, ofloxacin and cephalexin antibiotics on boron nitride nanosheets from aqueous solution, *J. Mol. Liq.* 293 (2019) 111376. <https://doi.org/10.1016/J.MOLLIQ.2019.111376>.
- [8] A. Mohseni-Bandpi, T.J. Al-Musawi, E. Ghahramani, M. Zarrabi, S. Mohebi, S.A. Vahed, Improvement of zeolite adsorption capacity for cephalexin by coating with magnetic Fe<sub>3</sub>O<sub>4</sub> nanoparticles, *J. Mol. Liq.* 218 (2016) 615–624. <https://doi.org/10.1016/J.MOLLIQ.2016.02.092>.
- [9] M.R. Samarghandi, T.J. Al-Musawi, A. Mohseni-Bandpi, M. Zarrabi, Adsorption of

- cephalexin from aqueous solution using natural zeolite and zeolite coated with manganese oxide nanoparticles, *J. Mol. Liq.* 211 (2015) 431–441.  
<https://doi.org/10.1016/J.MOLLIQ.2015.06.067>.
- [10] H. Liu, W. Liu, J. Zhang, C. Zhang, L. Ren, Y. Li, Removal of cephalexin from aqueous solutions by original and Cu(II)/Fe(III) impregnated activated carbons developed from lotus stalks Kinetics and equilibrium studies, *J. Hazard. Mater.* 185 (2011) 1528–1535.  
<https://doi.org/10.1016/J.JHAZMAT.2010.10.081>.
- [11] A.A. Al-Gheethi, M.S. Mohd Salleh, E.A. Noman, R.M.S.R. Mohamed, R. Crane, R. Hamdan, M. Naushad, Cephalexin Adsorption by Acidic Pretreated Jackfruit Adsorbent: A Deep Learning Prediction Model Study, *Water* 2022, Vol. 14, Page 2243. 14 (2022) 2243.  
<https://doi.org/10.3390/W14142243>.
- [12] Y. Zhao, H. Zhao, X. Zhao, Y. Qu, D. Liu, Synergistic effect of electrostatic and coordination interactions for adsorption removal of cephalexin from water using a zirconium-based metal-organic framework, *J. Colloid Interface Sci.* 580 (2020) 256–263.  
<https://doi.org/10.1016/J.JCIS.2020.07.013>.
- [13] M.Y. Nassar, I.S. Ahmed, H.S. Hendy, A facile one-pot hydrothermal synthesis of hematite ( $\alpha$ -Fe<sub>2</sub>O<sub>3</sub>) nanostructures and cephalexin antibiotic sorptive removal from polluted aqueous media, *J. Mol. Liq.* 271 (2018) 844–856.  
<https://doi.org/10.1016/J.MOLLIQ.2018.09.057>.
- [14] S. Afshin, Y. Rashtbari, B. Ramavandi, M. Fazlzadeh, M. Vosoughi, S.A. Mokhtari, M. Shirmardi, R. Rehman, Magnetic nanocomposite of filamentous algae activated carbon for efficient elimination of cephalexin from aqueous media, *Korean J. Chem. Eng.* 37 (2020)



80–92. <https://doi.org/10.1007/S11814-019-0424-6/METRICS>.

- [15] Y. Rashtbari, S. Hazrati, A. Azari, S. Afshin, M. Fazlzadeh, M. Vosoughi, A novel, eco-friendly and green synthesis of PPAC-ZnO and PPAC-nZVI nanocomposite using pomegranate peel: Cephalexin adsorption experiments, mechanisms, isotherms and kinetics, *Adv. Powder Technol.* 31 (2020) 1612–1623. <https://doi.org/10.1016/J.APT.2020.02.001>.
